# Supplementary material for: Chitosan Nanoparticles Loaded Poloxamer 407 Gel for Transungual Delivery of Terbinafine HCl
Source: MDPI journal article supplement (doi:10.3390/pharmaceutics14112353), 2022-10-31
Supplement: s1 [file s1]

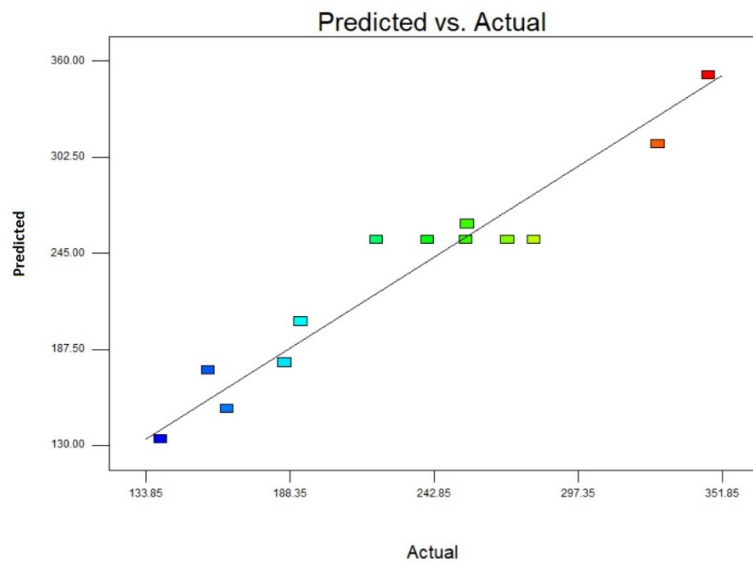

**Figure S1.** Design experts plot between predicted and actual values for particle size.

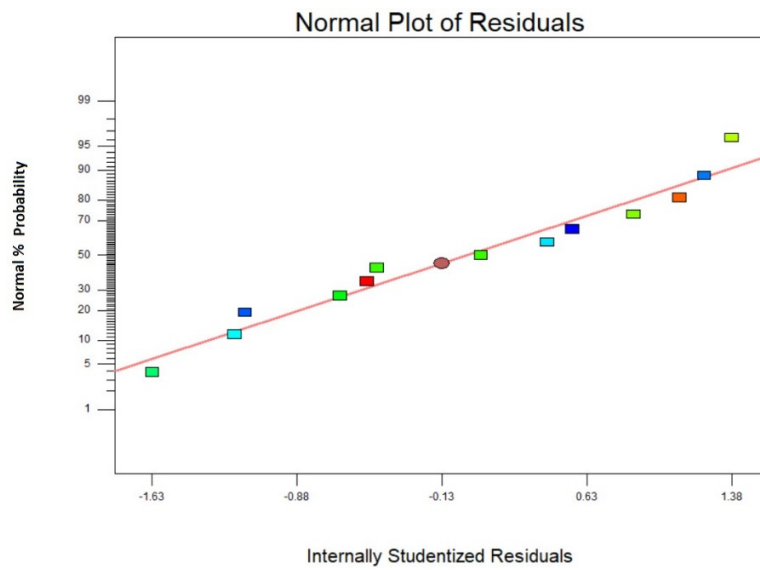

**Figure S2.** Normal plot of residuals for particle size.

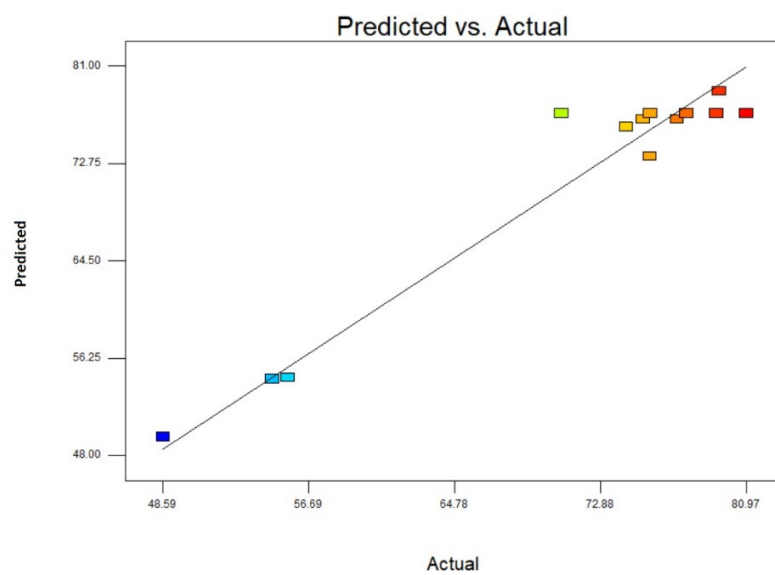

**Figure S3.** Design experts plot between predicted and actual values for EE.

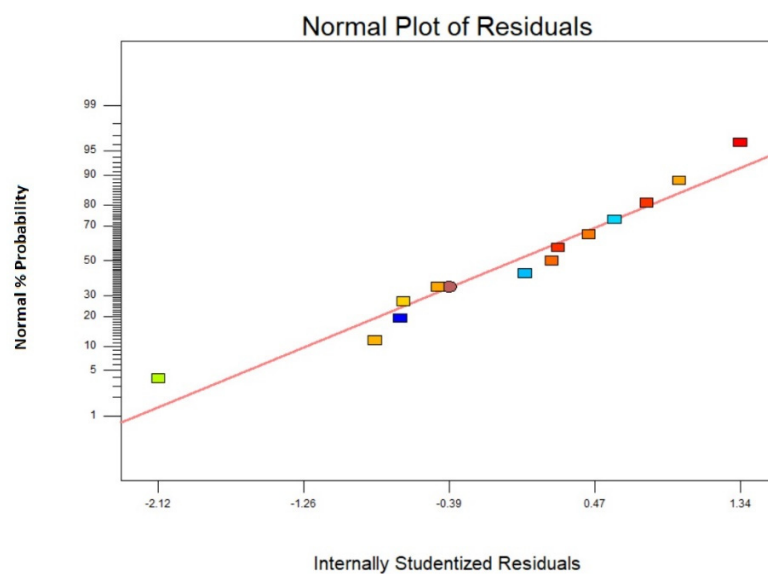

**Figure S4.** Normal plot of residuals for EE.
